# Supplementary material
Source: HighWire-hosted journal article supplement (https://jcp.bmj.com/content/76/6/367)
Supplement: inline-supplementary-material-1 [file inline-supplementary-material-1.pdf]

## 软骨母细胞瘤：单中心 307 例病例的临床病理分析及 H3F3 K36M 突变抗体的诊断价值

**目的：**我们阐述了中国软骨母细胞瘤的临床病理特征，并评估了突变特异性抗体 H3F3 K36M 免疫组化在软骨母细胞瘤中的诊断价值，包括在脱钙和非脱钙样本中。

**方法：**我们总结了我院自 2008 年至 2021 年诊断的 307 例软骨母细胞瘤的临床病理资料。在 185 例软骨母细胞瘤标本，一例继发于软骨母细胞瘤的高级别肉瘤标本中做了 H3F3 K36M 的免疫组化检测，对照组为 670 例其它原发性骨病变。

**结果：**我们的队列中有 307 个患者（225 个男性，82 个女性），年龄范围为 5-63 岁，平均年龄为 22.1 岁。软骨母细胞瘤最常累及长骨（63.8%，196/307），其次为手足短骨（22.1%，68/307），籽骨/髌骨（8.1%，25/307），扁骨和不规则骨（5.9%，18/307）。发生于长骨的患者平均年龄（20.3 岁）显著低于短骨（24.9 岁）和籽骨（24.4 岁）（ $P < 0.05$ ）。镜下，63.6%（117/184）的病例出现动脉瘤样骨囊肿样改变，26.1%（48/184）的病例有鸡笼样钙化，43.5%（80/184）的病例有坏死。在少数病例中也可以观察到骨皮质破坏，软组织侵犯及脉管内瘤栓。在所有的 136 例未脱钙软骨母细胞瘤，和 18 例 EDTA 脱钙的软骨母细胞瘤样本中 H3F3 K36M 免疫组化均为阳性；在盐酸脱钙样本中，H3F3K36M 免疫组化阳性率为 27/31（87.1%）；在继发于软骨母细胞瘤的高级别肉瘤中也是阳性。而在所有的 670 例其他原发性骨病变中免疫组化均为阴性。

**结论：**H3F3 K36M 抗体可以检测到位于 *H3F3A* 或 *H3F3B* 基因上的 K36M 突变，在非脱钙和 EDTA 脱钙样本中的敏感性和特异性均为 100%，在盐酸脱钙样本中的敏感性也大于 80%。实际上，所有的软骨母细胞瘤均存在 H3F3 K36M 突变。
